# Supplementary material
Source: PubMed Central journal article supplement (PMC9769934)

## **Supporting Information**

### **Supporting Figure legends**

**Figure S1. Four parameters curve fit model of the quantification of S1-binding antibody levels using the commercially available S1-binding IgA ELISA.**

**Figure S2. High correlations of purified-IgG and -IgA neutralizing activities with S1-binding antibody levels.**

The NT<sub>50</sub> values against S1-binding IgG and IgA levels are shown in panels **a** and **c**, respectively, and nIgG-EC<sub>50</sub> and nIgA-EC<sub>50</sub> values against the S1-binding IgG and IgA are shown in panels **b** and **d**, respectively. Blue symbols denote the samples collected from individuals with moderate symptom, while red symbols those from individuals with severe symptom.

**Figure S3. Kinetics and the correlations of nasal SARS-CoV-2-S1-binding-IgA levels and total IgG and IgA amounts in serum.**

The % SARS-CoV-2-S1-binding IgA levels in nasal swab samples were determined with the commercially available S1-binding IgA ELISA using a COVID-19-convalescent plasma's S1-binding IgA that was referred as 100%. **(a)** Temporal changes of the nasal S1-binding-IgA levels in over 18 days following the onset of the disease. **(b)** Correlation of % nasal S1-binding-IgA levels with that of sera/plasmas S1-binding IgA. Temporal changes of total human IgG and IgA levels following the diseases **(c** and **d)**. Correlation of total human IgA levels with that of IgG is shown **(e)**. Blue symbols denote the samples collected from individuals with moderate symptom, while red symbols those from individuals with severe symptom.

**Figure S4. COVID-19 mRNA-vaccine induces significant neutralizing activity and S1-binding antibody levels in COVID-19-experienced individuals.**

The neutralizing activity of sera/plasmas, purified-IgG, and purified-IgA (**a**, **b**, and **d**, respectively) and the amounts of S1-binding IgG and S1-binding IgA (**c** and **e**, respectively) were compared between the pre- and post-vaccination. Green symbols denote the samples collected before COVID-19 mRNA-vaccination, while yellow and light-blue denote after the 1st and 2nd doses, respectively. Each symbol denotes the sample from one and the same individual.

**Figure S5. Correlations of sera/plasmas, purified-IgG, and -IgA neutralizing activities with S1-binding antibody levels.**

The NT<sub>50</sub> values against (**a**) nIgG-EC<sub>50</sub> values, (**b**) nIgA-EC<sub>50</sub> values, (**d**) S1-binding-IgG level (S1-binding IgG), and (**f**) S1-binding-IgA level are plotted. Note that neutralizing activity of IgG primarily contributes to sera/plasmas SARS-CoV-2-neutralizing activity compared to that of IgA (**a**, **b**, and **c**) in previously-COVID-19-contracted individuals following COVID-19 mRNA vaccination. Green symbols denote the samples collected before COVID-19 mRNA-vaccination, while yellow and light-blue denote after the 1st and 2nd doses, respectively. Each symbol denotes the sample from one and the same individual.

## Supporting Table

**Table S1. Experimental therapeutic agents used in the COVID-19 group.**

|                                 | All patients<br>(n = 14) | Moderate<br>(n = 7) | Severe<br>(n = 7) |
|---------------------------------|--------------------------|---------------------|-------------------|
| Experimental therapeutic agents |                          |                     |                   |
| Remdesivir (RDV)                | 4 (28.6%)                | 2 (28.6%)           | 2 (28.6%)         |
| Lopinavir/ritonavir (LPV/r)     | 2 (14.3%)                | 1 (14.3%)           | 1 (14.3%)         |
| Hydroxychloroquine (HCQ)        | 3 (21.4%)                | 2 (28.6%)           | 1 (14.3%)         |
| HCQ + Azithromycin (AZM)        | 3 (21.4%)                | 0 (0%)              | 3 (42.9%)         |
| inhaled Ciclesonide (CIC)       | 1 (7.1%)                 | 1 (14.3%)           | 0 (0%)            |
| Favipiravir (FPV)               | 1 (7.1%)                 | 0 (0%)              | 1 (14.3%)         |
| None                            | 2 (14.3%)                | 1 (14.3%)           | 1 (14.3%)         |
| Corticosteroid use              |                          |                     |                   |
| Hydrocortisone (HDC)            | 4 (28.6%)                | 0 (0%)              | 4 (57.1%)         |
| Methylprednisolone (mPSL)       | 1 (7.1%)                 | 0 (0%)              | 1 (14.3%)         |
| PMX-DHP                         | 3 (21.4%)                | 0 (0%)              | 3 (42.9%)         |

Abbreviation: PMX-DHP; polymyxin B-immobilized fiber column direct hemoperfusion

Supporting Figure 1

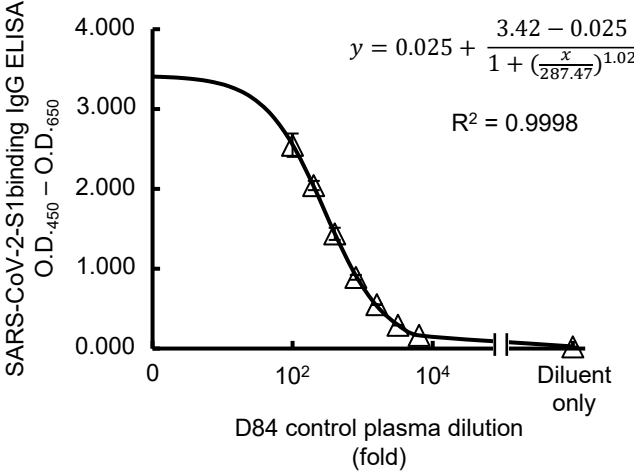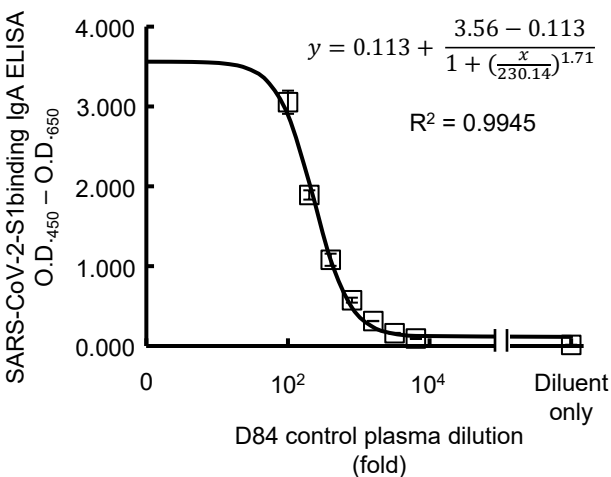

Supporting Figure 2

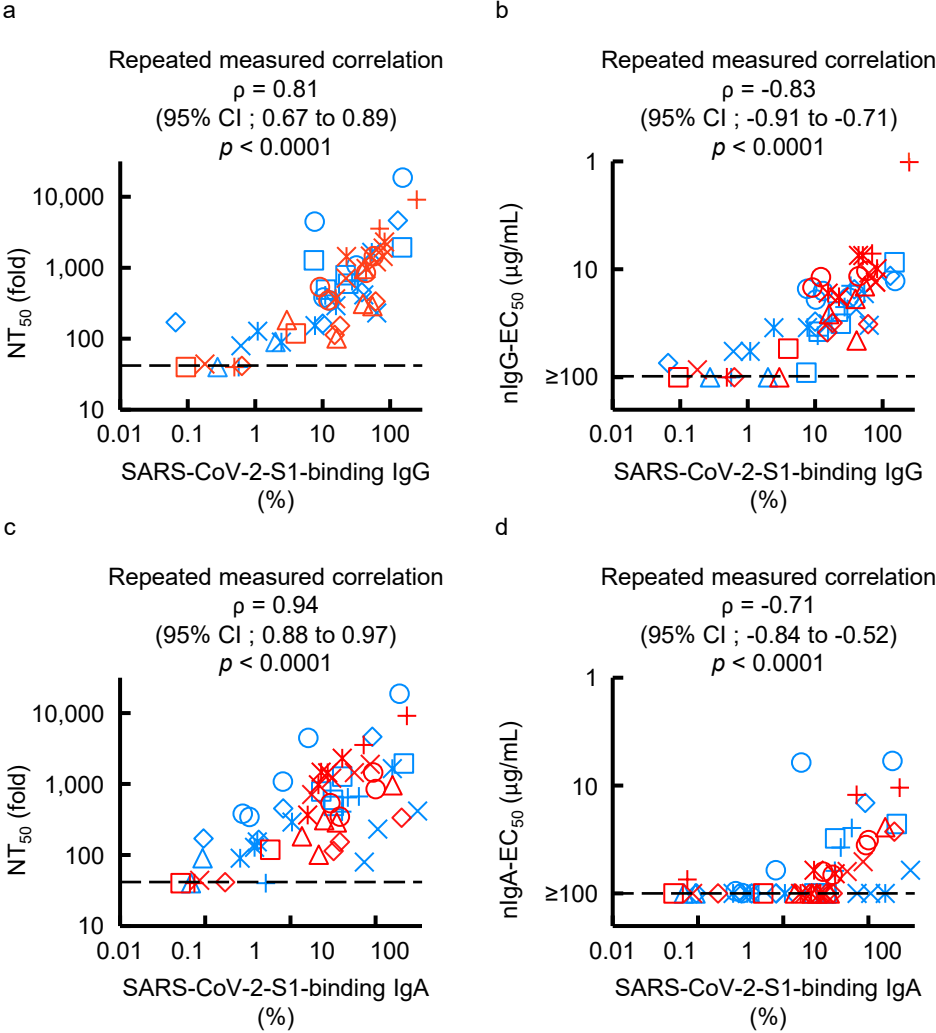

Supporting Figure 3

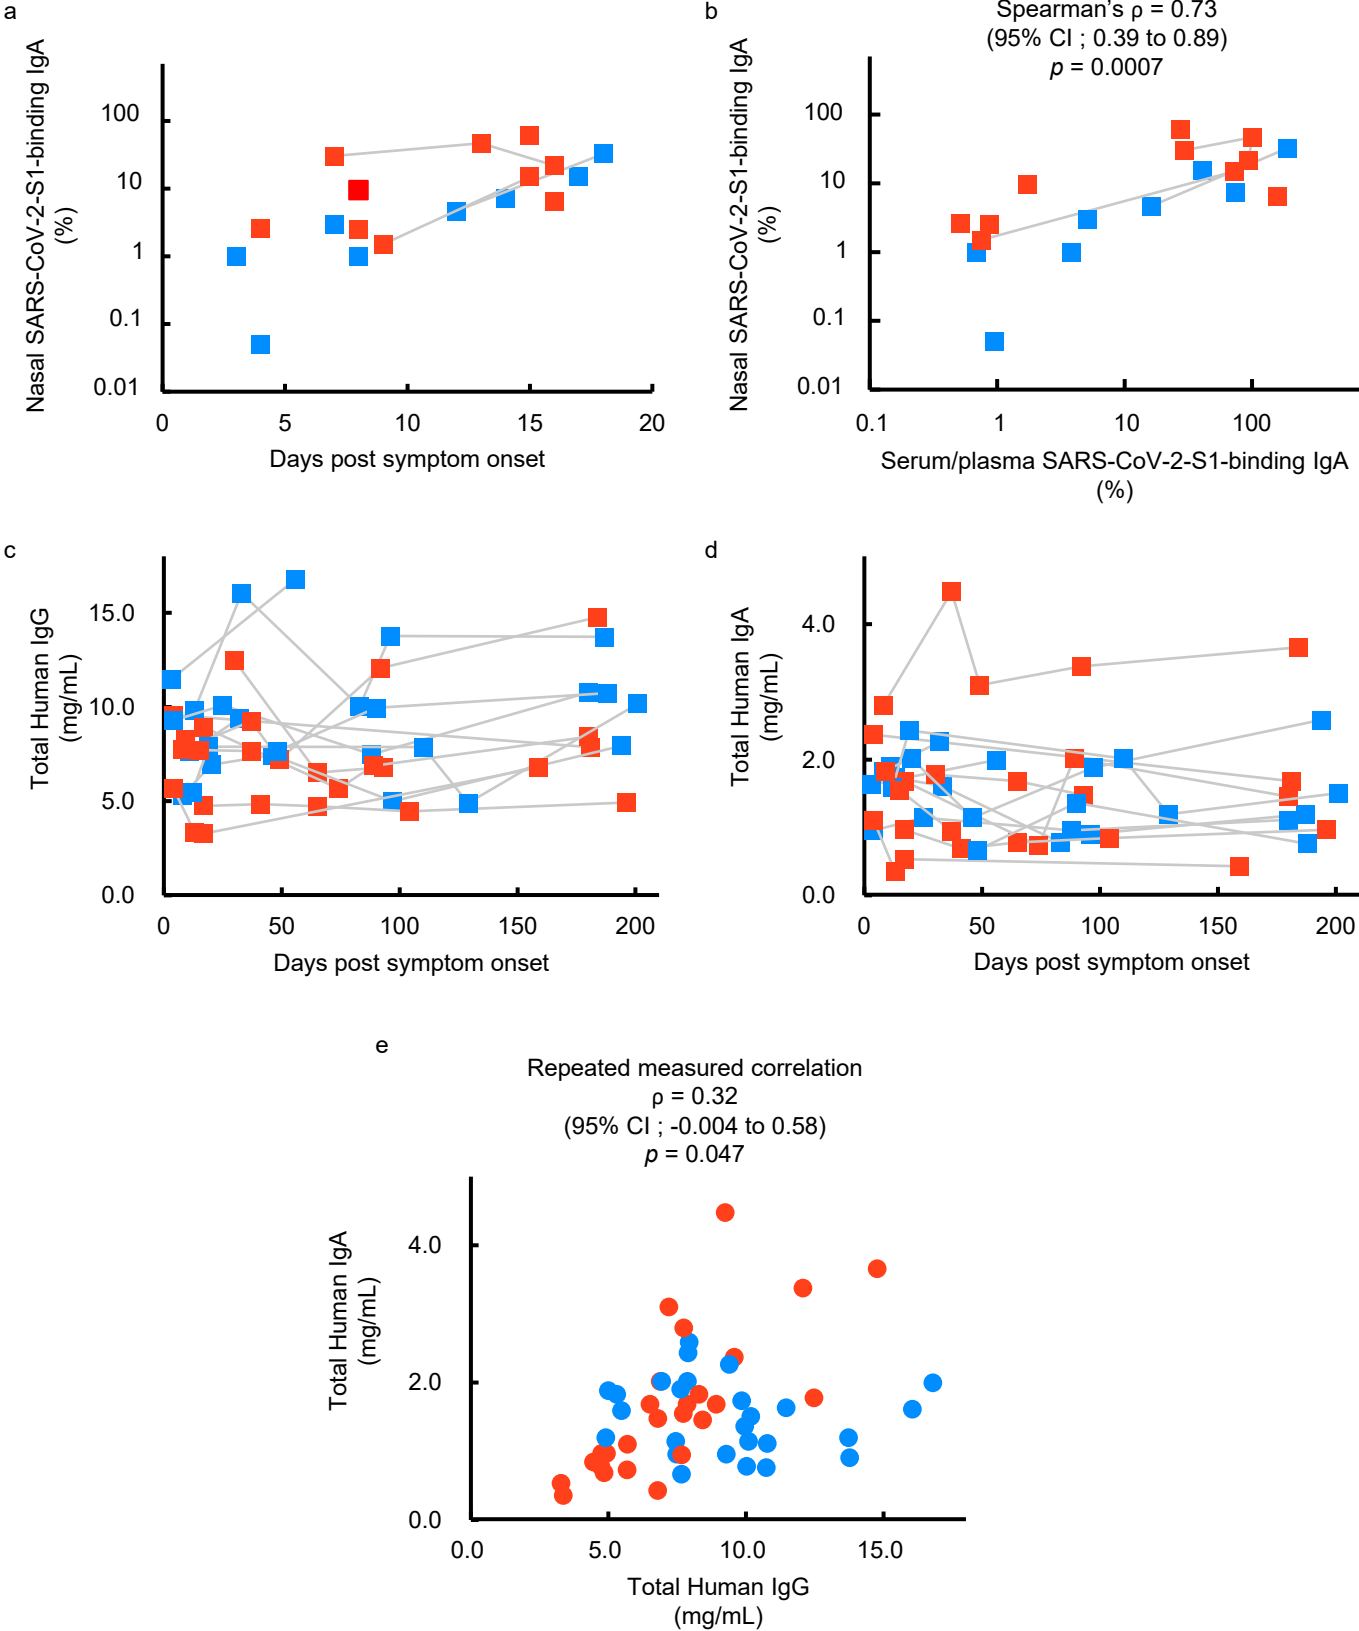

Supporting Figure 4

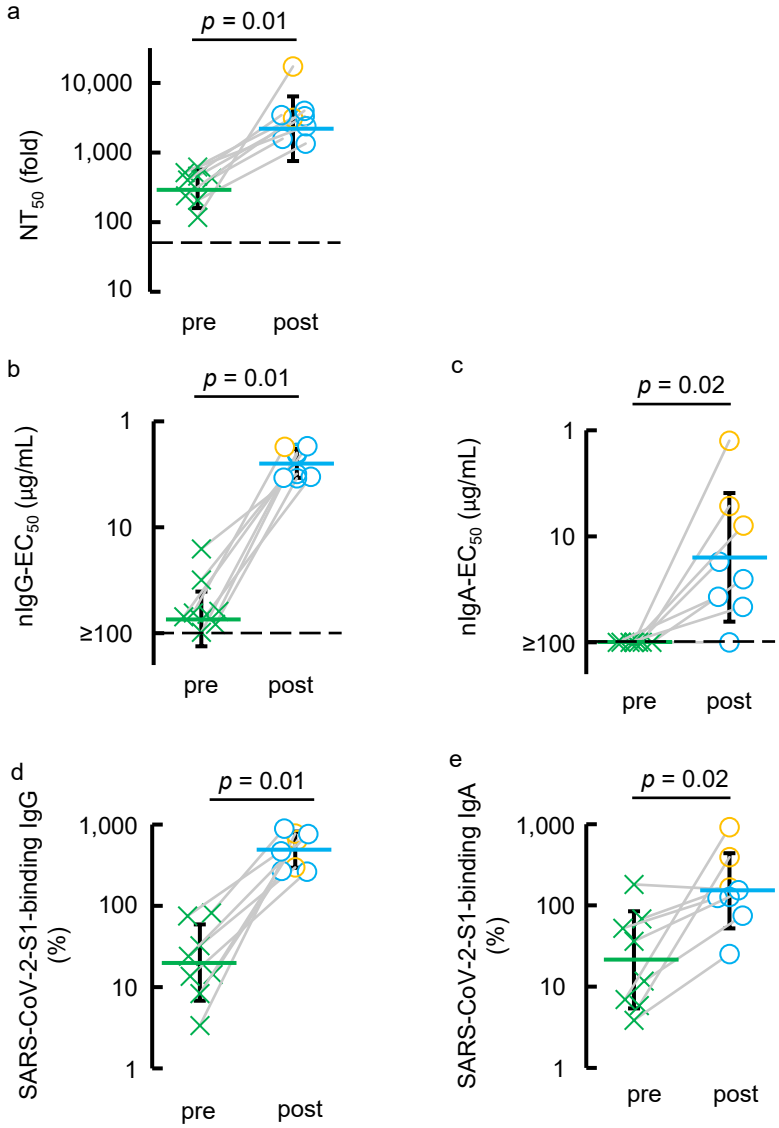

Supporting Figure 5

a

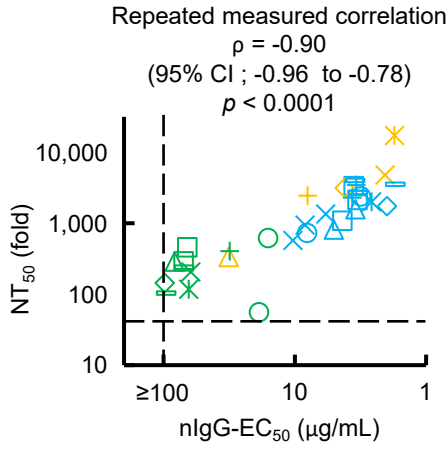

d

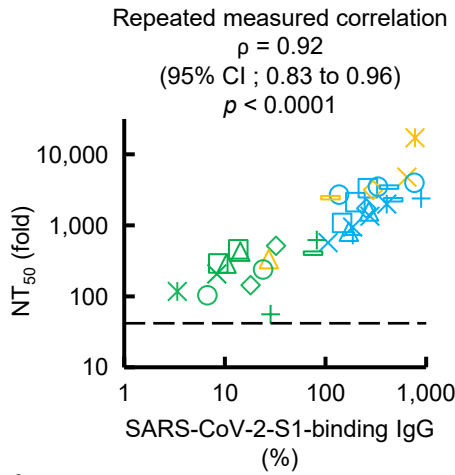

f

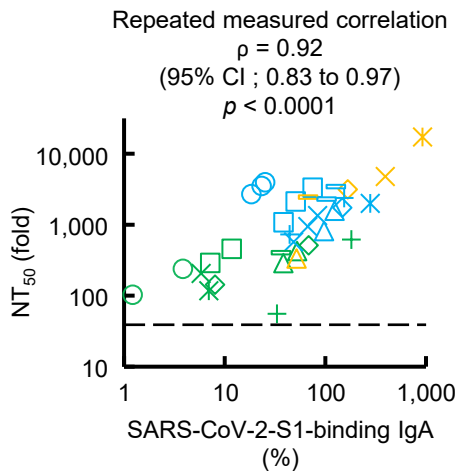

b

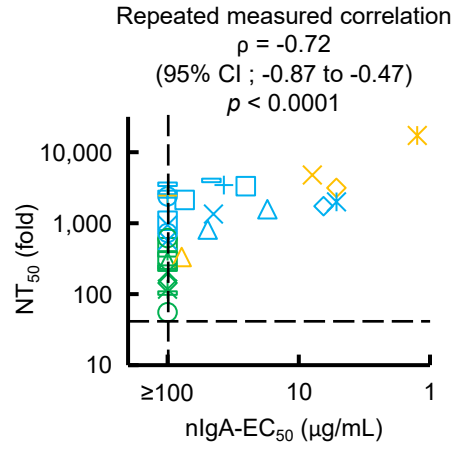

e

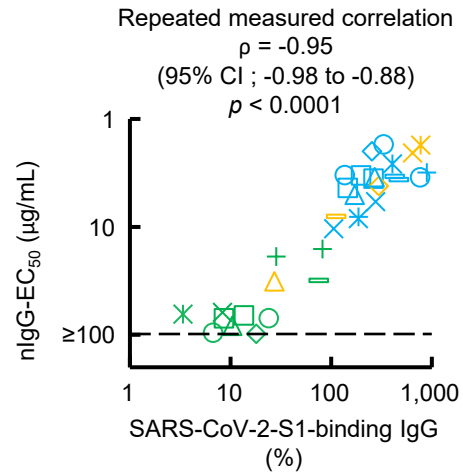

g

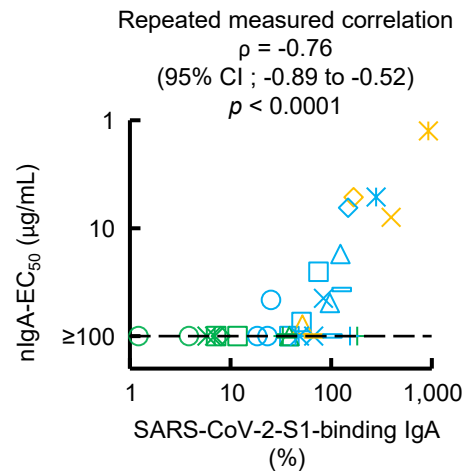

c

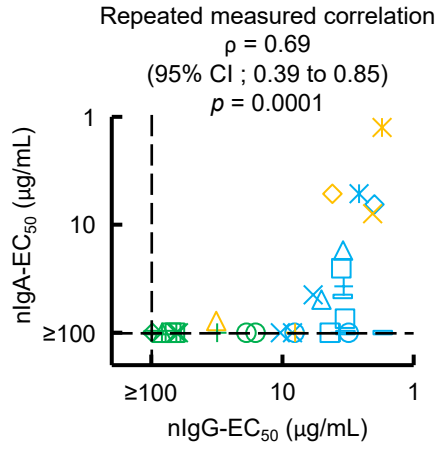

Supplement: spectrum.02716-22-s0001.pdf [file spectrum.02716-22-s0001.pdf]
